# Supplementary material for: Effects of Multiple Global Change Factors on Symbiotic and Asymbiotic N2 Fixation: Results Based on a Pot Experiment
Source: MDPI journal article supplement (doi:10.3390/nitrogen4010011), 2023-03-17
Supplement: s1 [file s1]

Archive with 1 entries (1 files):
- nitrogen-2179155-supplementary.pdf
