# Supplementary material for: Effects of Multiple Global Change Factors on Symbiotic and Asymbiotic N2 Fixation: Results Based on a Pot Experiment
Source: MDPI journal article supplement (doi:10.3390/nitrogen4010011), 2023-03-17
Supplement: s1 [file s1 › nitrogen-2179155-supplementary.pdf]

# Effects of multiple global change factors on symbiotic and asymbiotic N<sub>2</sub> fixation: results based on a pot experiment

Zhanchuan Wang<sup>1, 2, 4†</sup>, Xibin Sun<sup>3†</sup>, Hao Chen<sup>3</sup>, Dejun Li<sup>1, 4\*</sup>

<sup>1</sup> Key Laboratory of Agro-ecological Processes in Subtropical Region, Institute of Subtropical Agriculture, Chinese Academy of Sciences, Changsha 410125, Hunan, China

<sup>2</sup> Key Laboratory of Environment Change and Resources Use in Beibu Gulf, Ministry of Education, Nanning Normal University, Nanning 530001, Guangxi, China

<sup>3</sup> State Key Laboratory of Biocontrol, School of Ecology, Sun Yat-sen University, Shenzhen 518107, Guangdong, China

<sup>4</sup> Guangxi Key Laboratory of Karst Ecological Processes and Services, Huanjiang Observation and Research Station for Karst Ecosystems, Chinese Academy of Sciences, Huanjiang 547100, Guangxi, China

**\*Correspondence:** Dejun Li, Email: lidejun@hotmail.com; dejunli@isa.ac.cn; Dejun Li (ORCID ID: <https://orcid.org/0000-0002-6376-5786>)

<sup>†</sup> These authors contributed equally to the work.

**Table S1.** Results of two-way ANOVA showing the effects of site (ST), species (SP), and their interaction on soil NO<sub>3</sub><sup>-</sup>, NH<sub>4</sub><sup>+</sup> and available P.

|         | Soil NO <sub>3</sub> <sup>-</sup> |                  | Soil NH <sub>4</sub> <sup>+</sup> |                  | Soil available P |                  |
|---------|-----------------------------------|------------------|-----------------------------------|------------------|------------------|------------------|
|         | F value                           | <i>p</i> value   | F value                           | <i>p</i> value   | F value          | <i>p</i> value   |
| ST      | <b>8.78</b>                       | <b>&lt; 0.01</b> | <b>13.44</b>                      | <b>&lt; 0.01</b> | <b>40.00</b>     | <b>&lt; 0.01</b> |
| SP      | 2.89                              | 0.11             | 1.10                              | 0.31             | 0.19             | 0.67             |
| ST × SP | 0.39                              | 0.57             | 0.19                              | 0.67             | 0.01             | 0.92             |

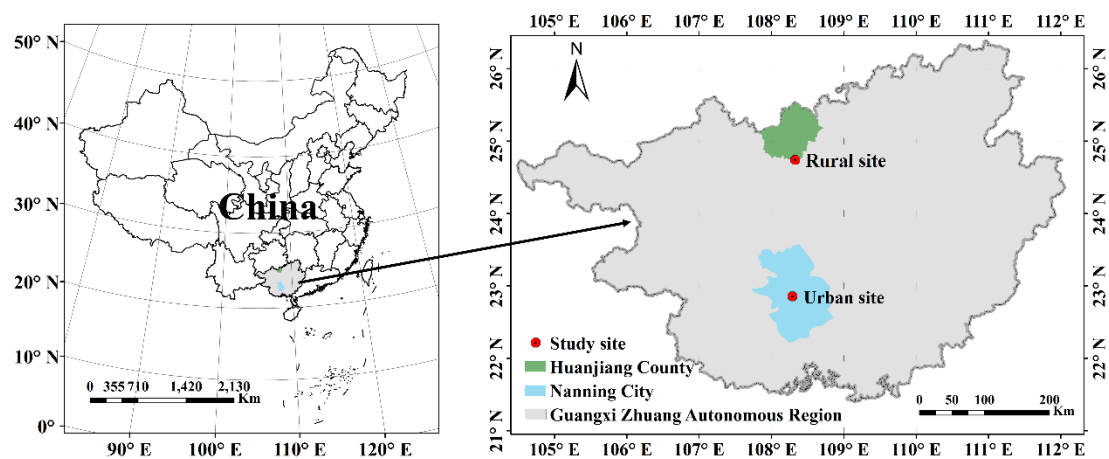

**Figure S1.** Schematic showing the geographic locations of the rural and urban sites.

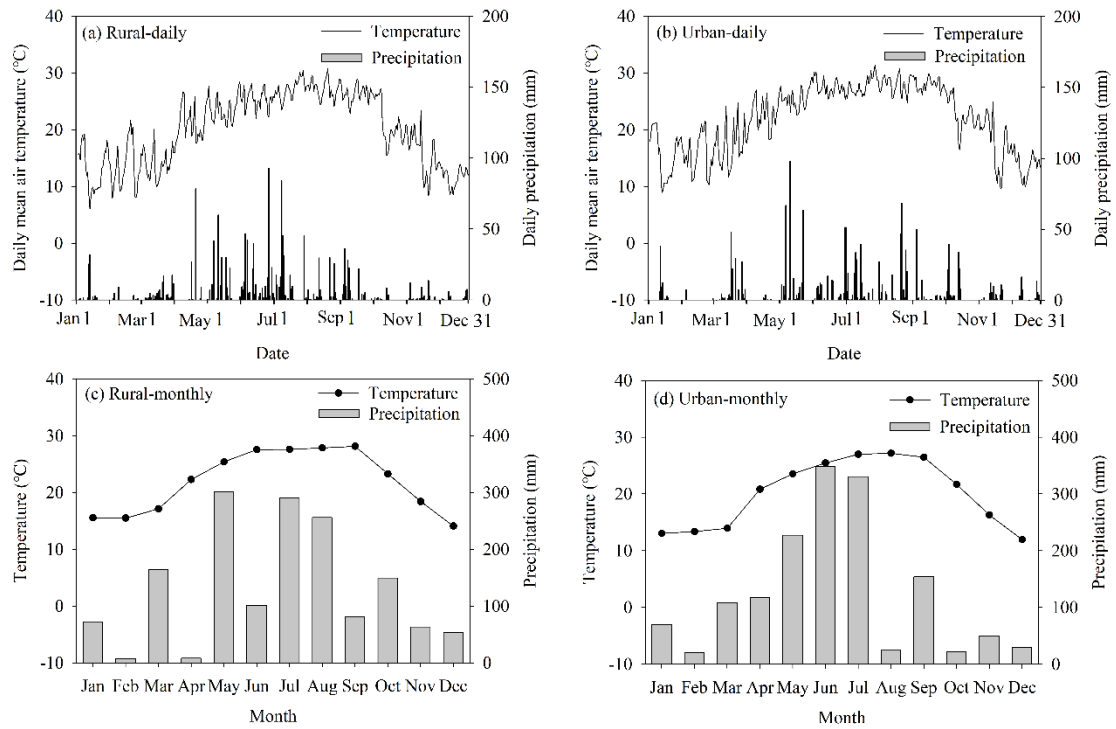

**Figure S2.** Daily and monthly air temperature and cumulated precipitation at rural and urban sites in 2017. (a) Daily mean air temperature and daily precipitation at rural site, (b) daily mean air temperature and daily precipitation at urban site, (c) monthly air temperature and cumulated precipitation at rural site, (d) monthly air temperature and cumulated precipitation at urban site. Data were obtained from Chinese National Meteorological Centre (<https://data.cma.cn/>) in 2017.
